# Supplementary material
Source: Springer Nature journal article supplement (https://www.springerprofessional.de/resource/supplementary/13688_2018_137_MOESM4_ESM.pdf/15705494)
Supplement: MOESM4 [file 15705494]

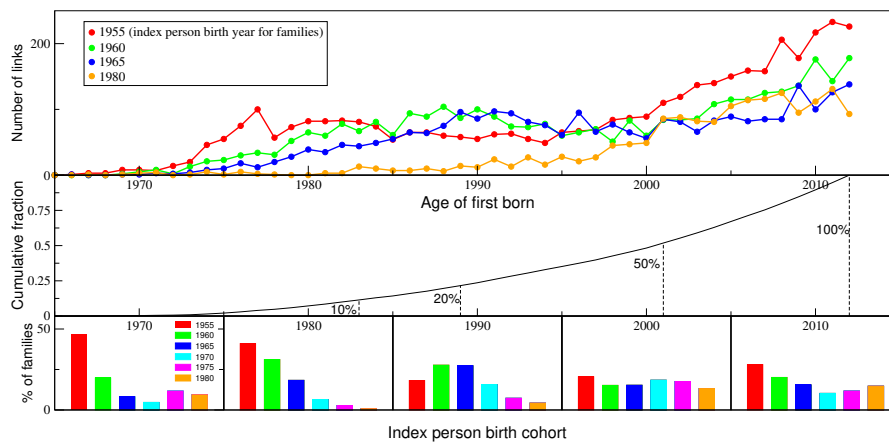

Additional file 4: Growth of the network in time. (Top) The number of links that appear on a given year (birth year of the firstborn from a parental union) having one family (or both) with the birth year of the index person indicated in the legend (four out of the six cases are shown). (Middle) The cumulative fraction of links as they appear in time. (Bottom) Relative presence of families from the six birth-years of index person shown in five non-overlapping periods – 1966-1975, 1976-1985, 1986-1995, 1996-2005, and 2006-2012. The variation in the height of the bars reveal the periodicity that is present in the contribution.
